# Supplementary material for: In situ fabrication of a 2D/2D WO3/Bi5O7I S-scheme heterojunction with enhanced spatial charge separation and tetracycline degradation
Source: Royal Society of Chemistry journal article supplement (doi:10.1039/d3ce01158e), 2023-12-27
Supplement: d3ce01158e1.pdf [file d3ce01158e1.pdf]

Supporting Information

## **In-Situ Fabrication of 2D/2D WO<sub>3</sub>/Bi<sub>5</sub>O<sub>7</sub>I S-Scheme Heterojunction with Enhanced Spatial Charges Separation and Tetracycline Degradation**

Jiahao Zhu<sup>a</sup>, Changdong Chen<sup>a,c</sup>, Wei Wang<sup>b</sup>, Zhe Kan<sup>a</sup>, Ying Gao<sup>a</sup>, Lei Chen<sup>a,\*</sup>, Fangfang Wang<sup>a,\*</sup>

AUTHOR ADDRESS.

<sup>a</sup>School of petrochemical Engineering, Liaoning Petrochemical University, Fushun 113001, Liaoning, China.

<sup>b</sup>College of Chemistry and Chemical Engineering, Jinggangshan University, Ji'an 343009, Jiangxi, China.

<sup>c</sup>Department of Advanced Materials Science, Faculty of Engineering, Kagawa University, Takamatsu, 761-0396, Japan

**Table S1. Comparisons of this work with literature.**

| Materials                                                                                  | Preparation                                           | Degradation efficiency                               | Apparent first-order rate constants(min <sup>-1</sup> ) | Year | Ref.               |
|--------------------------------------------------------------------------------------------|-------------------------------------------------------|------------------------------------------------------|---------------------------------------------------------|------|--------------------|
| 2D/2D WO <sub>3</sub> /Bi <sub>5</sub> O <sub>7</sub> I                                    | One step calcination method                           | Removal 99.15% tetracycline in 75 min                | 0.04814                                                 | 2023 | This work          |
| 2D/2D direct Z-scheme WO <sub>3</sub> /Bi <sub>5</sub> O <sub>7</sub> I                    | Solvothermal-calcination technique.                   | Removal 99.6% RhB in 80 min                          | -                                                       | 2023 | Ref. <sup>1</sup>  |
| Type-II Bi <sub>5</sub> O <sub>7</sub> I / WO <sub>3</sub>                                 | Electrophoresis deposition                            | Removal 95.2% VOCs in 80 min                         | 0.02                                                    | 2022 | Ref. <sup>2</sup>  |
| WO <sub>3</sub> /BiOI heterojunction                                                       | hydrothermal method                                   | Removal 98.2% RhB in 30 min                          | 0.1344                                                  | 2021 | Ref. <sup>3</sup>  |
| Z-scheme WO <sub>3</sub> /BiOBr                                                            | Solvothermal method                                   | Removal 94.7% ciprofloxacin hydrochloride in 120 min | 0.02581                                                 | 2020 | Ref. <sup>4</sup>  |
| WO <sub>3</sub> /BiOCl heterojunction                                                      | Cryolysis                                             | Removal 100% RhB in 180 min                          | 0.048                                                   | 2011 | Ref. <sup>5</sup>  |
| WO <sub>3</sub> /BiOI heterojunction                                                       | Hydrothermal method                                   | Removal 66.8% MO in 100 min                          | 0.0108                                                  | 2015 | Ref. <sup>6</sup>  |
| WO <sub>3</sub> nanofibers decorated on BiOCl nanosheets                                   | Sol synthesis and electrospinning technique           | Removal 95% RhB in 15 min                            | 0.259                                                   | 2019 | Ref. <sup>7</sup>  |
| WO <sub>3</sub> /Bi <sub>24</sub> O <sub>31</sub> Br <sub>10</sub> nanosheet               | Hydrothermal method                                   | Removal 80% TC in 60 min                             | 0.02                                                    | 2018 | Ref. <sup>8</sup>  |
| 2D/2D WO <sub>3</sub> /BiOBr S-scheme heterojunction                                       | a facile hydrothermal method                          | Removal 98% TC in 60 min                             | -                                                       | 2022 | Ref. <sup>9</sup>  |
| Integration of Bi <sub>5</sub> O <sub>7</sub> I with TiO <sub>2</sub>                      | hydrothermal method                                   | Removal 99.7% RhB in 90 min                          | 0.0682                                                  | 2021 | Ref. <sup>10</sup> |
| Colored TiO <sub>2</sub> nanoparticle-sensitized Bi <sub>5</sub> O <sub>7</sub> I nanorods | Roasting method                                       | Removal 89% Hg <sup>0</sup> in 90 min                | -                                                       | 2019 | Ref. <sup>11</sup> |
| Z-scheme (001)TiO <sub>2</sub> /Bi <sub>5</sub> O <sub>7</sub> I                           | Deposition method.                                    | Removal above 90% RhB in 60 min                      | 0.04315                                                 | 2022 | Ref. <sup>12</sup> |
| BiOBr nanosheets-decorated TiO <sub>2</sub> nanofibers                                     | Solvothermal method                                   | Removal 89% RhB in 20 min                            | 0.103                                                   | 2019 | Ref. <sup>13</sup> |
| Brookite/BiOBr                                                                             | Hydrothermal method                                   | Removal 100% RhB in 20 min                           | -                                                       | 2021 | Ref. <sup>14</sup> |
| BiOBr/TiO <sub>2</sub> nanotube arrays                                                     | Successive ionic layer adsorption and reaction method | Removal 85% RhB in 150 min                           | -                                                       | 2021 | Ref. <sup>15</sup> |
| Spherical BiOBr modified TiO <sub>2</sub>                                                  | Hydrothermal method                                   | Removal 99.5% RhB in 100 min                         | -                                                       | 2022 | Ref. <sup>16</sup> |

**Table S2 Data fitting of EIS in Fig.7c.**

| Samples                                               | R <sub>s</sub> (Ω) | R <sub>ct</sub> (KΩ) |
|-------------------------------------------------------|--------------------|----------------------|
| WO <sub>3</sub>                                       | 15.2               | 2.71                 |
| Bi <sub>5</sub> O <sub>7</sub> I                      | 19.5               | 1.88                 |
| 15% WO <sub>3</sub> /Bi <sub>5</sub> O <sub>7</sub> I | 13.5               | 1.33                 |

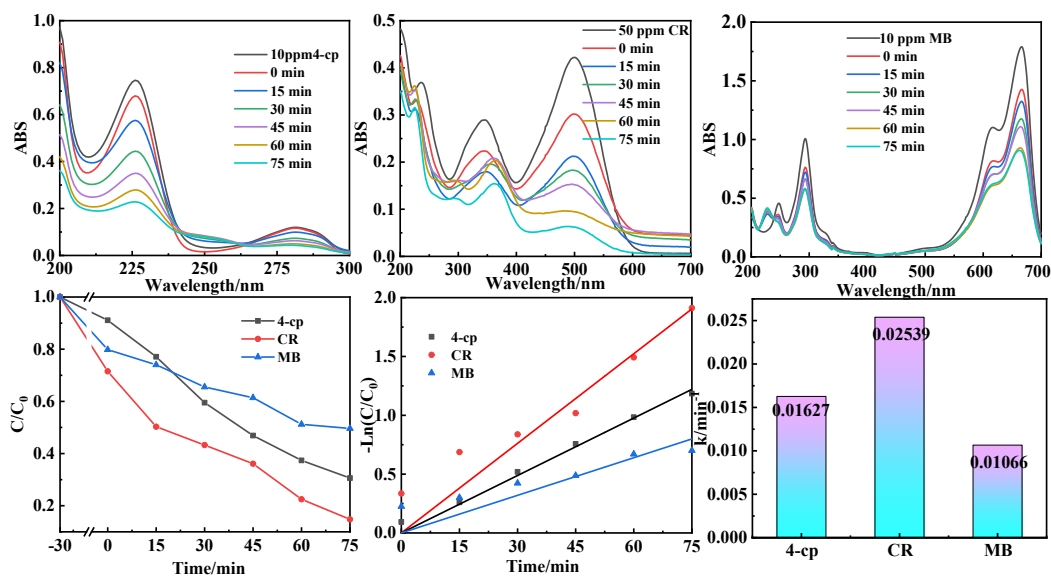

Fig. S1. Degradation plots and First order kinetics constant ( $k_{app}$ ) for photocatalytic degradation of model pollutants

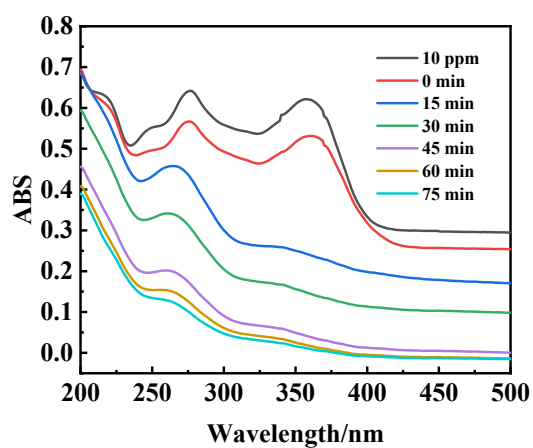

Figure S2 UV-Vis absorption spectrum of the degradation product by 15%WO<sub>3</sub>/Bi<sub>5</sub>O<sub>7</sub>I

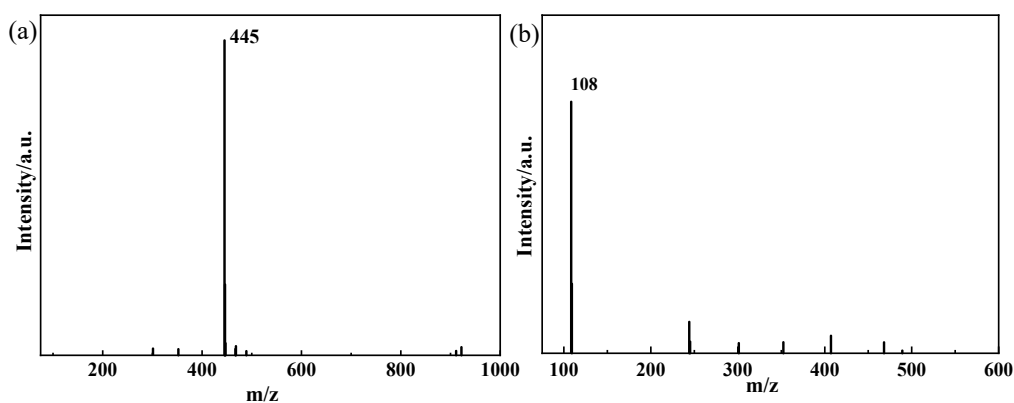

Figure S3 HPLC-MS spectra of (a) tetracycline, (b) Final product obtained after a photo degradation of 75 minutes by 15%WO<sub>3</sub>/Bi<sub>5</sub>O<sub>7</sub>I

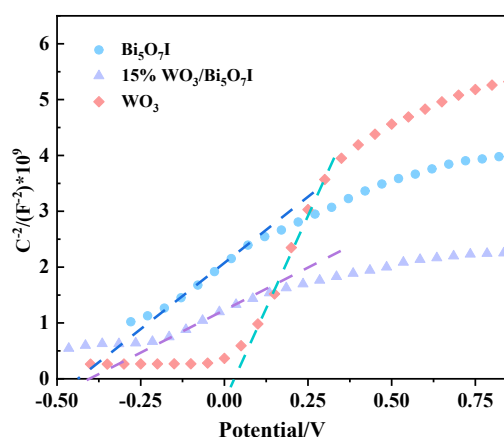

Fig.S4. Mott-Schottky plots of WO<sub>3</sub>, Bi<sub>5</sub>O<sub>7</sub>I, and 15% WO<sub>3</sub>/Bi<sub>5</sub>O<sub>7</sub>I

## Reference

1. Y. Zhang, H. Liu, J. Peng, J. Guo, B. Wang, L. Ding, X. Cao, Y. Chang and G. Liu, *Applied Surface Science*, 2023, **614**.
2. S. Wang, Z. Zheng, Y. Guan, J. Mei, R. Liu, D. Mao, J. Shen and Z. Li, *Materials Today Communications*, 2022, **33**.
3. X. Lu, Q. Li, L. Wang, W. Jiang, R. Luo, M. Zhang, C. Cui, Z. Tian and G. Zhu, *RSC Adv*, 2021, **11**, 16608-16618.
4. Y. Ling and Y. Dai, *Applied Surface Science*, 2020, **509**.
5. S. Shamaila, A. K. Sajjad, F. Chen and J. Zhang, *J Colloid Interface Sci*, 2011, **356**, 465-472.
6. J. Luo, X. Zhou, L. Ma and X. Xu, *Journal of Molecular Catalysis A: Chemical*, 2015, **410**, 168-176.
7. Y. Xiao, Z. He, R. Wang, X. Tao and B. Li, *Colloids and Surfaces A: Physicochemical and Engineering Aspects*, 2019, **580**.
8. W. Wu, X. Ma, D. Li, Y. Xuan, S. Meng and M. Chen, *Journal of Materials Science*, 2018, **53**, 15804-15816.
9. C. Liu, S. Mao, H. Wang, Y. Wu, F. Wang, M. Xia and Q. Chen, *Chemical Engineering Journal*, 2022, **430**.
10. S. Feizpoor, A. Habibi-Yangjeh, H. Chand and V. Krishnan, *Journal of Photochemistry and Photobiology A: Chemistry*, 2021, **410**.
11. W. J. Cheng H, Tian F, et al., *Chemical Engineering Journal*, 2019, DOI: 10.1016/j.cej.2018.07.093, 951-963.
12. X. Mai, W. Lin, J. Chen, Q. Yang and R. Gao, *Reaction Kinetics, Mechanisms and Catalysis*, 2022, **135**, 3447-3459.
13. K. Wang, Y. Zhang, L. Liu, N. Lu and Z. Zhang, *Journal of Materials Science*, 2019, **54**, 8426-8435.
14. G. Park, C.-H. Shin, J. Kang, K.-S. Lee, C. Zhang, B. Lim, C. Kim and J.-S. Yu, *Journal of Materials Chemistry A*, 2021, **9**, 12060-12073.
15. B. Ma, S. Xin, Y. Xin, X. Ma, C. Zhang and M. Gao, *Journal of Environmental Chemical Engineering*, 2021, **9**.
16. F. Chen, A. He, Y. Wang, W. Yu, H. Chen, F. Geng, Z. Li, Z. Zhou, Y. Liang, J. Fu, L. Zhao and Y. Wang, *Chemosphere*, 2022, **298**, 134176.
